# Supplementary material
Source: PubMed Central journal article supplement (PMC6867507)
Supplement: HBM-37-4099-s001.pdf [file HBM-37-4099-s001.pdf]

# Supporting Information

## SI Results (related to Figure 4A/B)

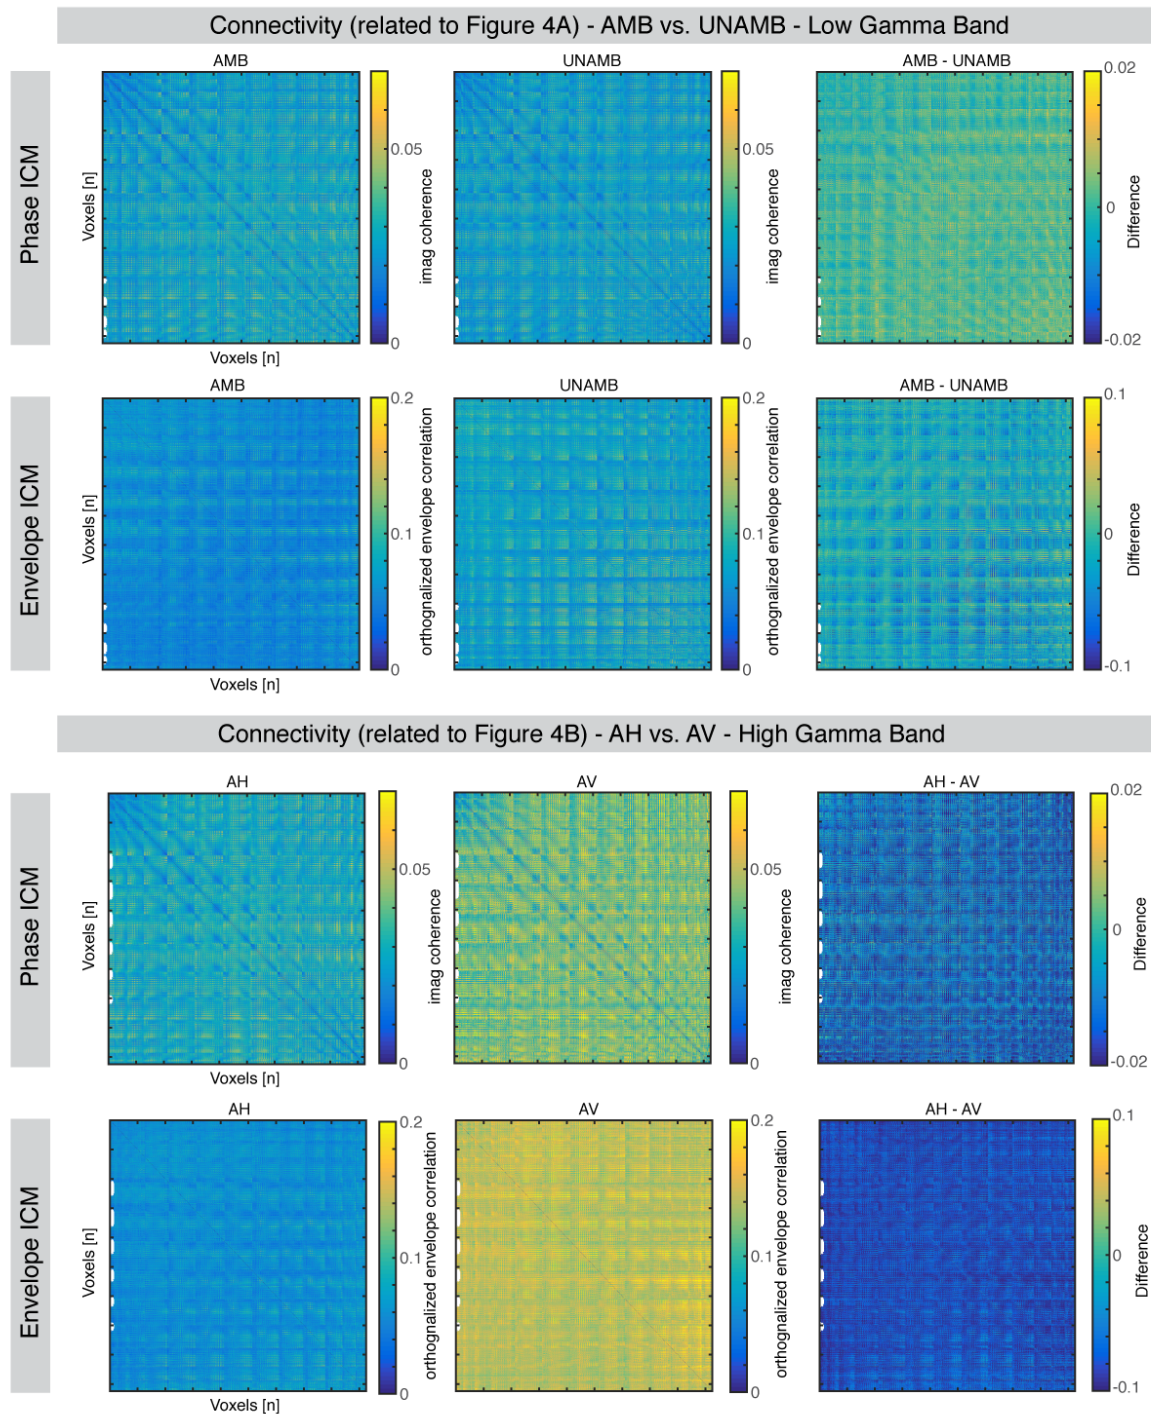

**Connectivity matrices underlying the statistical maps in Figure 4 for both coupling modes.** Note the different scaling for phase and envelope ICMs. The white dots indicate the ROI that was used for the computation of the statistical map (upper: bilateral parietal voxels; lower: bilateral occipital voxels). Also note that the power

envelope correlations matrix does not necessarily have to be symmetric, since the resulting value slightly varies depending on whether signal A was orthogonalized to B or vice versa.

First row: Phase ICM: low gamma range for AMB and UNAMB as well as their difference

Second row: Envelope ICM: low gamma range for AMB and UNAMB and the difference

Third row: Phase ICM: high gamma range for AH vs. AV as well as the difference

Fourth row: Envelope ICM: high gamma range for AH vs. AV as well as their difference
